# Supplementary material
Source: publisher figshare collection journal article supplement (https://acs.figshare.com/ndownloader/files/4681243)
Supplement: Supplementary file 1 [file 4681243]

 
data_51008cm 
 
_audit_creation_method            SHELXL-97 
_chemical_name_systematic 
; 
 ? 
; 
_chemical_name_common             ? 
_chemical_melting_point           ? 
_chemical_formula_moiety          'C4 H20 Er O20 P4 Ru2, 8(H2 O)'
_chemical_formula_sum 
 'C4 H36 Er O28 P4 Ru2' 
_chemical_formula_weight          1025.61 
 
loop_ 
 _atom_type_symbol 
 _atom_type_description 
 _atom_type_scat_dispersion_real 
 _atom_type_scat_dispersion_imag 
 _atom_type_scat_source 
 'C'  'C'   0.0033   0.0016 
 'International Tables Vol C Tables 4.2.6.8 and 6.1.1.4' 
 'H'  'H'   0.0000   0.0000 
 'International Tables Vol C Tables 4.2.6.8 and 6.1.1.4' 
 'O'  'O'   0.0106   0.0060 
 'International Tables Vol C Tables 4.2.6.8 and 6.1.1.4' 
 'P'  'P'   0.1023   0.0942 
 'International Tables Vol C Tables 4.2.6.8 and 6.1.1.4' 
 'Ru'  'Ru'  -1.2594   0.8363 
 'International Tables Vol C Tables 4.2.6.8 and 6.1.1.4' 
 'Er'  'Er'  -0.2586   4.9576 
 'International Tables Vol C Tables 4.2.6.8 and 6.1.1.4' 
 
_symmetry_cell_setting           'Monoclinic'
_symmetry_space_group_name_H-M   'C2/c  '
_symmetry_space_group_name_Hall   '-C 2yc'
 
loop_ 
 _symmetry_equiv_pos_as_xyz 
 'x, y, z' 
 '-x, y, -z+1/2' 
 'x+1/2, y+1/2, z' 
 '-x+1/2, y+1/2, -z+1/2' 
 '-x, -y, -z' 
 'x, -y, z-1/2' 
 '-x+1/2, -y+1/2, -z' 
 'x+1/2, -y+1/2, z-1/2' 
 
_cell_length_a                    12.376(4) 
_cell_length_b                    14.501(5) 
_cell_length_c                    15.451(5) 
_cell_angle_alpha                 90.00 
_cell_angle_beta                  94.416(3) 
_cell_angle_gamma                 90.00 
_cell_volume                      2764.9(16) 
_cell_formula_units_Z             4 
_cell_measurement_temperature     293(2) 
_cell_measurement_reflns_used     956 
_cell_measurement_theta_min       2.85 
_cell_measurement_theta_max       27.98 
 
_exptl_crystal_description        'block' 
_exptl_crystal_colour             'red brown' 
_exptl_crystal_size_max           0.22 
_exptl_crystal_size_mid           0.15 
_exptl_crystal_size_min           0.10 
_exptl_crystal_density_meas       ? 
_exptl_crystal_density_diffrn     2.464 
_exptl_crystal_density_method     'not measured' 
_exptl_crystal_F_000              2000 
_exptl_absorpt_coefficient_mu     4.427 
_exptl_absorpt_correction_type    'multi-scan' 
_exptl_absorpt_correction_T_min   0.6187 
_exptl_absorpt_correction_T_max   0.6659 
_exptl_absorpt_process_details    'SADABS, Bruker(2000)' 
 
_exptl_special_details 
; 
 ? 
; 
 
_diffrn_ambient_temperature       293(2) 
_diffrn_radiation_wavelength      0.71073 
_diffrn_radiation_type            MoK\a 
_diffrn_radiation_source          'fine-focus sealed tube' 
_diffrn_radiation_monochromator   graphite 
_diffrn_measurement_device_type   'Bruker Smart Apex CCD area detector' 
_diffrn_measurement_method        'phi and omega scans
_diffrn_detector_area_resol_mean  ? 
_diffrn_standards_number          ? 
_diffrn_standards_interval_count  ? 
_diffrn_standards_interval_time   ? 
_diffrn_standards_decay_%         ? 
_diffrn_reflns_number             7989 
_diffrn_reflns_av_R_equivalents   0.0408 
_diffrn_reflns_av_sigmaI/netI     0.0703 
_diffrn_reflns_limit_h_min        -15 
_diffrn_reflns_limit_h_max        15 
_diffrn_reflns_limit_k_min        -16 
_diffrn_reflns_limit_k_max        17 
_diffrn_reflns_limit_l_min        -19 
_diffrn_reflns_limit_l_max        12 
_diffrn_reflns_theta_min          2.47 
_diffrn_reflns_theta_max          26.00 
_reflns_number_total              2714 
_reflns_number_gt                 2187 
_reflns_threshold_expression      >2sigma(I) 
 
_computing_data_collection        'SMART (Bruker, 2000)'
_computing_cell_refinement        'SMART'
_computing_data_reduction         'SAINT (Bruker, 2000)'
_computing_structure_solution     'SHELXS-97 (Sheldrick, 1990)' 
_computing_structure_refinement   'SHELXL-97 (Sheldrick, 1997)' 
_computing_molecular_graphics     'SHELXTL'
_computing_publication_material   'SHELXTL'
 
_refine_special_details 
; 
 Refinement of F^2^ against ALL reflections.  The weighted R-factor wR and 
 goodness of fit S are based on F^2^, conventional R-factors R are based 
 on F, with F set to zero for negative F^2^. The threshold expression of 
 F^2^ > 2sigma(F^2^) is used only for calculating R-factors(gt) etc. and is 
 not relevant to the choice of reflections for refinement.  R-factors based 
 on F^2^ are statistically about twice as large as those based on F, and R- 
 factors based on ALL data will be even larger. 
; 
 
_refine_ls_structure_factor_coef  Fsqd  
_refine_ls_matrix_type            full 
_refine_ls_weighting_scheme       calc  
_refine_ls_weighting_details 
 'calc w=1/[\s^2^(Fo^2^)+(0.0600P)^2^+1.5500P] where P=(Fo^2^+2Fc^2^)/3' 
_atom_sites_solution_primary      direct 
_atom_sites_solution_secondary    difmap 
_atom_sites_solution_hydrogens    geom 
_refine_ls_hydrogen_treatment     mixed 
_refine_ls_extinction_method      none 
_refine_ls_extinction_coef        ? 
_refine_ls_number_reflns          2714 
_refine_ls_number_parameters      178 
_refine_ls_number_restraints      0 
_refine_ls_R_factor_all           0.0765 
_refine_ls_R_factor_gt            0.0541 
_refine_ls_wR_factor_ref          0.1174 
_refine_ls_wR_factor_gt           0.1121 
_refine_ls_goodness_of_fit_ref    1.088 
_refine_ls_restrained_S_all       1.088 
_refine_ls_shift/su_max           0.000 
_refine_ls_shift/su_mean          0.000 
 
loop_ 
 _atom_site_label 
 _atom_site_type_symbol 
 _atom_site_fract_x 
 _atom_site_fract_y 
 _atom_site_fract_z 
 _atom_site_U_iso_or_equiv 
 _atom_site_adp_type 
 _atom_site_occupancy 
 _atom_site_symmetry_multiplicity 
 _atom_site_calc_flag 
 _atom_site_refinement_flags 
 _atom_site_disorder_assembly 
 _atom_site_disorder_group 
Ru1 Ru 0.66634(6) 0.21202(5) 0.49810(5) 0.0322(2) Uani 1 1 d . . . 
Er1 Er 0.5000 0.51086(4) 0.2500 0.03035(18) Uani 1 2 d S . . 
P1 P 0.80058(15) 0.15451(13) 0.35404(13) 0.0212(4) Uani 1 1 d . . . 
P2 P 0.68604(15) 0.33769(14) 0.34571(13) 0.0225(4) Uani 1 1 d . . . 
O1 O 0.7118(3) 0.1204(3) 0.4104(3) 0.0194(11) Uani 1 1 d . . . 
O2 O 0.8907(4) 0.1996(4) 0.4139(3) 0.0216(11) Uani 1 1 d . . . 
O3 O 0.8464(4) 0.0795(4) 0.3005(3) 0.0241(11) Uani 1 1 d . . . 
O4 O 0.6022(4) 0.2935(3) 0.4013(3) 0.0229(11) Uani 1 1 d . . . 
O5 O 0.7819(4) 0.3763(3) 0.4058(3) 0.0189(10) Uani 1 1 d . . . 
O6 O 0.6362(4) 0.4088(3) 0.2852(3) 0.0200(10) Uani 1 1 d . . . 
O7 O 0.8246(5) 0.2753(4) 0.2326(4) 0.0267(12) Uani 1 1 d . . . 
H7C H 0.8750 0.2954 0.2675 0.032 Uiso 1 1 d R . . 
O8 O 0.5088(4) 0.1337(4) 0.4929(4) 0.0226(11) Uani 1 1 d . . . 
H8B H 0.4582 0.1700 0.5033 0.027 Uiso 1 1 d R . . 
H8C H 0.4958 0.1104 0.4430 0.027 Uiso 1 1 d R . . 
O9 O 0.5709(4) 0.6291(4) 0.3511(4) 0.0225(11) Uani 1 1 d . . . 
H9A H 0.5386 0.6262 0.3972 0.027 Uiso 1 1 d R . . 
H9C H 0.5602 0.6812 0.3278 0.027 Uiso 1 1 d R . . 
O10 O 0.5251(4) 0.4519(4) 0.1085(3) 0.0222(11) Uani 1 1 d . . . 
H10A H 0.4823 0.4074 0.0978 0.027 Uiso 1 1 d R . . 
H10C H 0.5895 0.4337 0.1064 0.027 Uiso 1 1 d R . . 
O11 O 0.0202(5) 0.4987(4) 0.1250(3) 0.0261(12) Uani 1 1 d . . . 
H11D H 0.0876 0.4924 0.1225 0.031 Uiso 1 1 d R . . 
H11B H -0.0006 0.4658 0.1657 0.031 Uiso 1 1 d R . . 
O12 O 0.6918(4) 0.5391(4) 0.4980(4) 0.0275(12) Uani 1 1 d . . . 
H12D H 0.6694 0.5273 0.4462 0.033 Uiso 1 1 d R . . 
H12A H 0.7568 0.5218 0.5070 0.033 Uiso 1 1 d R . . 
O13 O 0.8504(5) 0.4584(3) 0.2229(4) 0.0259(11) Uani 1 1 d . . . 
H13D H 0.7863 0.4569 0.1997 0.031 Uiso 1 1 d R . . 
H13B H 0.8668 0.5130 0.2372 0.031 Uiso 1 1 d R . . 
O14 O 0.8144(5) 0.3111(5) 0.0437(4) 0.0359(14) Uani 1 1 d . . . 
H14D H 0.7574 0.3383 0.0560 0.043 Uiso 1 1 d R . . 
H14C H 0.8381 0.2784 0.0862 0.043 Uiso 1 1 d R . . 
C1 C 0.7393(7) 0.2440(6) 0.2803(6) 0.034(2) Uani 1 1 d . . . 
C2 C 0.6536(7) 0.2042(5) 0.2213(6) 0.0294(18) Uani 1 1 d . . . 
H2A H 0.6845 0.1565 0.1857 0.044 Uiso 1 1 calc R . . 
H2B H 0.6211 0.2527 0.1835 0.044 Uiso 1 1 calc R . . 
H2C H 0.5979 0.1769 0.2550 0.044 Uiso 1 1 calc R . . 
 
loop_ 
 _atom_site_aniso_label 
 _atom_site_aniso_U_11 
 _atom_site_aniso_U_22 
 _atom_site_aniso_U_33 
 _atom_site_aniso_U_23 
 _atom_site_aniso_U_13 
 _atom_site_aniso_U_12 
Ru1 0.0294(4) 0.0293(4) 0.0381(4) -0.0003(3) 0.0039(3) -0.0006(3) 
Er1 0.0325(3) 0.0315(3) 0.0268(3) 0.000 0.0010(2) 0.000 
P1 0.0188(9) 0.0237(10) 0.0211(10) -0.0009(8) 0.0024(7) -0.0012(7) 
P2 0.0211(9) 0.0264(10) 0.0200(11) -0.0010(8) 0.0017(8) 0.0009(7) 
O1 0.009(2) 0.015(2) 0.034(3) -0.001(2) 0.003(2) -0.0028(18) 
O2 0.020(2) 0.025(3) 0.021(3) 0.004(2) 0.002(2) -0.001(2) 
O3 0.030(3) 0.027(3) 0.015(2) 0.000(2) 0.000(2) -0.007(2) 
O4 0.032(3) 0.016(3) 0.021(3) -0.002(2) 0.001(2) -0.003(2) 
O5 0.018(2) 0.015(2) 0.023(3) -0.002(2) 0.002(2) 0.0079(19) 
O6 0.017(2) 0.017(2) 0.027(3) 0.004(2) 0.0085(19) 0.0074(19) 
O7 0.032(3) 0.033(3) 0.016(3) 0.005(2) 0.008(2) 0.006(2) 
O8 0.023(2) 0.024(3) 0.022(3) 0.006(2) 0.006(2) -0.005(2) 
O9 0.025(3) 0.020(3) 0.023(3) 0.004(2) 0.006(2) 0.002(2) 
O10 0.021(2) 0.026(3) 0.019(3) -0.002(2) 0.000(2) 0.011(2) 
O11 0.033(3) 0.027(3) 0.019(3) 0.009(2) 0.005(2) 0.009(2) 
O12 0.025(3) 0.029(3) 0.029(3) -0.001(2) 0.000(2) 0.016(2) 
O13 0.036(3) 0.016(2) 0.026(3) 0.000(2) 0.009(2) 0.007(2) 
O14 0.032(3) 0.052(4) 0.024(3) 0.025(3) 0.003(2) 0.006(3) 
C1 0.028(4) 0.027(4) 0.048(5) -0.011(4) 0.000(4) -0.005(3) 
C2 0.032(4) 0.020(4) 0.035(5) -0.003(3) -0.008(3) -0.003(3) 
 
_geom_special_details 
; 
 All esds (except the esd in the dihedral angle between two l.s. planes) 
 are estimated using the full covariance matrix.  The cell esds are taken 
 into account individually in the estimation of esds in distances, angles 
 and torsion angles; correlations between esds in cell parameters are only 
 used when they are defined by crystal symmetry.  An approximate (isotropic) 
 treatment of cell esds is used for estimating esds involving l.s. planes. 
; 
 
loop_ 
 _geom_bond_atom_site_label_1 
 _geom_bond_atom_site_label_2 
 _geom_bond_distance 
 _geom_bond_site_symmetry_2 
 _geom_bond_publ_flag 
Ru1 O1 2.009(5) . ? 
Ru1 O4 2.020(5) . ? 
Ru1 O5 2.027(5) 7_656 ? 
Ru1 O2 2.034(5) 7_656 ? 
Ru1 O8 2.253(5) . ? 
Ru1 Ru1 2.3423(15) 7_656 ? 
Er1 O6 2.278(5) 2_655 ? 
Er1 O6 2.278(5) . ? 
Er1 O3 2.333(6) 4_655 ? 
Er1 O3 2.333(6) 3_455 ? 
Er1 O10 2.389(5) 2_655 ? 
Er1 O10 2.389(5) . ? 
Er1 O9 2.436(5) . ? 
Er1 O9 2.436(5) 2_655 ? 
P1 O3 1.504(6) . ? 
P1 O1 1.536(5) . ? 
P1 O2 1.539(5) . ? 
P1 C1 1.851(10) . ? 
P2 O6 1.493(5) . ? 
P2 O4 1.537(6) . ? 
P2 O5 1.554(5) . ? 
P2 C1 1.845(9) . ? 
O2 Ru1 2.034(5) 7_656 ? 
O3 Er1 2.333(6) 3_545 ? 
O5 Ru1 2.027(5) 7_656 ? 
O7 C1 1.408(11) . ? 
O7 H7C 0.8445 . ? 
O8 H8B 0.8428 . ? 
O8 H8C 0.8446 . ? 
O9 H9A 0.8437 . ? 
O9 H9C 0.8432 . ? 
O10 H10A 0.8433 . ? 
O10 H10C 0.8432 . ? 
O11 H11D 0.8433 . ? 
O11 H11B 0.8436 . ? 
O12 H12D 0.8449 . ? 
O12 H12A 0.8436 . ? 
O13 H13D 0.8441 . ? 
O13 H13B 0.8430 . ? 
O14 H14D 0.8430 . ? 
O14 H14C 0.8443 . ? 
C1 C2 1.463(11) . ? 
C2 H2A 0.9800 . ? 
C2 H2B 0.9800 . ? 
C2 H2C 0.9800 . ? 
 
loop_ 
 _geom_angle_atom_site_label_1 
 _geom_angle_atom_site_label_2 
 _geom_angle_atom_site_label_3 
 _geom_angle 
 _geom_angle_site_symmetry_1 
 _geom_angle_site_symmetry_3 
 _geom_angle_publ_flag 
O1 Ru1 O4 90.1(2) . . ? 
O1 Ru1 O5 89.3(2) . 7_656 ? 
O4 Ru1 O5 174.8(2) . 7_656 ? 
O1 Ru1 O2 175.74(19) . 7_656 ? 
O4 Ru1 O2 89.4(2) . 7_656 ? 
O5 Ru1 O2 90.8(2) 7_656 7_656 ? 
O1 Ru1 O8 85.9(2) . . ? 
O4 Ru1 O8 88.8(2) . . ? 
O5 Ru1 O8 86.1(2) 7_656 . ? 
O2 Ru1 O8 89.9(2) 7_656 . ? 
O1 Ru1 Ru1 92.02(13) . 7_656 ? 
O4 Ru1 Ru1 92.29(16) . 7_656 ? 
O5 Ru1 Ru1 92.87(14) 7_656 7_656 ? 
O2 Ru1 Ru1 92.22(14) 7_656 7_656 ? 
O8 Ru1 Ru1 177.67(15) . 7_656 ? 
O6 Er1 O6 99.0(3) 2_655 . ? 
O6 Er1 O3 143.57(18) 2_655 4_655 ? 
O6 Er1 O3 75.49(18) . 4_655 ? 
O6 Er1 O3 75.49(18) 2_655 3_455 ? 
O6 Er1 O3 143.57(18) . 3_455 ? 
O3 Er1 O3 129.5(3) 4_655 3_455 ? 
O6 Er1 O10 80.80(18) 2_655 2_655 ? 
O6 Er1 O10 72.25(18) . 2_655 ? 
O3 Er1 O10 128.70(17) 4_655 2_655 ? 
O3 Er1 O10 71.33(18) 3_455 2_655 ? 
O6 Er1 O10 72.25(18) 2_655 . ? 
O6 Er1 O10 80.80(18) . . ? 
O3 Er1 O10 71.33(18) 4_655 . ? 
O3 Er1 O10 128.70(17) 3_455 . ? 
O10 Er1 O10 138.1(3) 2_655 . ? 
O6 Er1 O9 146.46(18) 2_655 . ? 
O6 Er1 O9 94.64(18) . . ? 
O3 Er1 O9 69.64(18) 4_655 . ? 
O3 Er1 O9 75.39(17) 3_455 . ? 
O10 Er1 O9 74.39(18) 2_655 . ? 
O10 Er1 O9 140.58(18) . . ? 
O6 Er1 O9 94.64(18) 2_655 2_655 ? 
O6 Er1 O9 146.46(18) . 2_655 ? 
O3 Er1 O9 75.39(17) 4_655 2_655 ? 
O3 Er1 O9 69.64(18) 3_455 2_655 ? 
O10 Er1 O9 140.58(18) 2_655 2_655 ? 
O10 Er1 O9 74.39(18) . 2_655 ? 
O9 Er1 O9 90.6(2) . 2_655 ? 
O3 P1 O1 113.2(3) . . ? 
O3 P1 O2 110.6(3) . . ? 
O1 P1 O2 108.3(3) . . ? 
O3 P1 C1 108.9(4) . . ? 
O1 P1 C1 107.3(3) . . ? 
O2 P1 C1 108.4(3) . . ? 
O6 P2 O4 112.0(3) . . ? 
O6 P2 O5 112.6(3) . . ? 
O4 P2 O5 109.5(3) . . ? 
O6 P2 C1 108.2(4) . . ? 
O4 P2 C1 106.5(4) . . ? 
O5 P2 C1 107.7(3) . . ? 
P1 O1 Ru1 114.7(3) . . ? 
P1 O2 Ru1 113.4(3) . 7_656 ? 
P1 O3 Er1 147.6(3) . 3_545 ? 
P2 O4 Ru1 114.5(3) . . ? 
P2 O5 Ru1 113.2(3) . 7_656 ? 
P2 O6 Er1 149.4(3) . . ? 
C1 O7 H7C 108.9 . . ? 
Ru1 O8 H8B 109.3 . . ? 
Ru1 O8 H8C 109.7 . . ? 
H8B O8 H8C 109.4 . . ? 
Er1 O9 H9A 109.7 . . ? 
Er1 O9 H9C 108.7 . . ? 
H9A O9 H9C 109.5 . . ? 
Er1 O10 H10A 109.3 . . ? 
Er1 O10 H10C 109.7 . . ? 
H10A O10 H10C 109.5 . . ? 
H11D O11 H11B 109.4 . . ? 
H12D O12 H12A 109.6 . . ? 
H13D O13 H13B 109.5 . . ? 
H14D O14 H14C 109.5 . . ? 
O7 C1 C2 109.7(8) . . ? 
O7 C1 P2 111.4(5) . . ? 
C2 C1 P2 111.1(6) . . ? 
O7 C1 P1 105.1(5) . . ? 
C2 C1 P1 110.5(6) . . ? 
P2 C1 P1 109.0(5) . . ? 
C1 C2 H2A 109.5 . . ? 
C1 C2 H2B 109.5 . . ? 
H2A C2 H2B 109.5 . . ? 
C1 C2 H2C 109.5 . . ? 
H2A C2 H2C 109.5 . . ? 
H2B C2 H2C 109.5 . . ? 
 
loop_ 
 _geom_hbond_atom_site_label_D 
 _geom_hbond_atom_site_label_H 
 _geom_hbond_atom_site_label_A 
 _geom_hbond_distance_DH 
 _geom_hbond_distance_HA 
 _geom_hbond_distance_DA 
 _geom_hbond_angle_DHA 
 _geom_hbond_site_symmetry_A 
O13 H13D O6  0.84 2.46 2.977(7) 120.2 . 
O12 H12D O9  0.84 2.36 2.928(8) 125.6 . 
O14 H14C O7  0.84 2.28 2.958(8) 137.3 . 
O8 H8B O14  0.84 1.95 2.709(8) 149.1 8_456 
O8 H8C O11  0.84 1.93 2.679(8) 146.6 4_545 
O9 H9A O2  0.84 2.15 2.701(7) 122.7 3_455 
O9 H9C O7  0.84 2.23 2.846(8) 130.0 4_655 
O13 H13D O3  0.84 2.42 3.001(7) 126.7 4_655 
O10 H10A O4  0.84 1.96 2.783(8) 166.7 2_655 
O11 H11D O5  0.84 2.40 3.091(7) 140.1 2_655 
O10 H10C O12  0.84 2.21 2.781(7) 124.9 6_565 
O14 H14D O12  0.84 2.12 2.712(8) 126.5 6_565 
O11 H11B O13  0.84 2.11 2.744(8) 131.8 1_455 
O12 H12A O1  0.84 2.44 2.918(7) 116.7 7_656 
O14 H14C O9  0.84 2.59 3.358(8) 150.9 4_645 
 
_diffrn_measured_fraction_theta_max    0.999 
_diffrn_reflns_theta_full              26.00 
_diffrn_measured_fraction_theta_full   0.999 
_refine_diff_density_max    0.776 
_refine_diff_density_min   -0.828 
_refine_diff_density_rms    0.167 
